# Supplementary material for: Design and Rationale of the Sevoflurane for Sedation in Acute Respiratory Distress Syndrome (SESAR) Randomized Controlled Trial
Source: MDPI journal article supplement (doi:10.3390/jcm11102796), 2022-05-16
Supplement: s1 [file s1]

**Supplementary Material File S5. Time-Events Schedule.**

| <b>Measurement/Event</b>                                             | <b>Day 0</b> | <b>1</b> | <b>2</b> | <b>3</b> | <b>4</b> | <b>5</b> | <b>6</b> | <b>7</b> | <b>14</b> | <b>28</b> | <b>90</b> | <b>365</b> |
|----------------------------------------------------------------------|--------------|----------|----------|----------|----------|----------|----------|----------|-----------|-----------|-----------|------------|
| Demographics, History and Physical                                   | X            |          |          |          |          |          |          |          |           |           |           |            |
| Etiology of ARDS                                                     | X            |          |          |          |          |          |          |          |           |           |           |            |
| APACHE II, SAPS II                                                   | X            |          |          |          |          |          |          |          |           |           |           |            |
| HCG (females)                                                        | X            |          |          |          |          |          |          |          |           |           |           |            |
| Alcohol Use/Smoking History                                          | X            |          |          |          |          |          |          |          |           |           |           |            |
| Study sevoflurane administration (maximum)                           | X            | (X)      |           |           |           |            |
| Level of sedation                                                    | X            | X        | X        | X        | X        | X        | X        | X        |           |           |           |            |
| Bispectral index value                                               | A            | A        | A        | A        | A        | A        | A        | A        |           |           |           |            |
| Sedation interruption (Y/N)                                          | N            | Y        | Y        | Y        | Y        | Y        | Y        | Y        |           |           |           |            |
| Ventilator parameters                                                | X            | X        | X        | X        | X        | X        | X        | X        |           |           |           |            |
| Hemodynamic parameters                                               | X            | X        | X        | X        | X        | X        | X        | X        |           |           |           |            |
| Arterial Blood Gases                                                 | X            | X        | X        | A        | A        | A        | A        | A        |           |           |           |            |
| K <sup>+</sup> , HCO <sub>3</sub> <sup>-</sup> , glucose             | A            | A        | A        | A        | A        | A        | A        | A        |           |           |           |            |
| Serum liver function tests (AST, ALT, bilirubin, INR)                | X            | X        | X        | X        | X        | X        | X        | X        |           |           |           |            |
| KDIGO criteria for acute kidney injury                               | X            | X        | X        | X        | X        | X        | X        | X        | X         |           |           |            |
| Pneumothorax (Y/N)                                                   | X            | X        | X        | X        | X        | X        | X        | X        |           |           |           |            |
| Use of rescue procedures (Y/N)                                       | X            | X        | X        | X        | X        | X        | X        | X        |           |           |           |            |
| Central Venous Pressure                                              | A            | A        | A        | A        | A        | A        | A        | A        |           |           |           |            |
| On-study meds: sedative, opioid, corticosteroid administration (Y/N) | X            | X        | X        | X        | X        | X        | X        | X        |           |           |           |            |
| SOFA Score (modified) <sup>B</sup>                                   | X            | X        | X        | X        | X        | X        | X        | X        | X         |           |           |            |
| CAM-ICU                                                              | X            | X        | X        | X        | X        | X        | X        |          |           |           |           |            |

|                                                                           |   |   |   |   |   |  |   |   |                  |   |   |   |
|---------------------------------------------------------------------------|---|---|---|---|---|--|---|---|------------------|---|---|---|
| Plasma Collection                                                         | X | X | X |   | X |  | X |   | X <sup>***</sup> |   |   |   |
| Urine Collection                                                          | X | X | X |   | X |  | X |   | X <sup>***</sup> |   |   |   |
| Whole Blood Collection for DNA/RNA studies                                | X |   | X |   |   |  |   |   |                  |   |   |   |
| Bronchoalveolar lavage                                                    | X |   |   | X |   |  |   |   |                  |   |   |   |
| Undiluted pulmonary edema fluid <sup>£</sup>                              | X | X |   |   |   |  |   |   |                  |   |   |   |
| Collection of heat moisture exchanger filters <sup>£</sup>                |   | X |   |   |   |  |   |   |                  |   |   |   |
| Collection of AnaConDa-S filters <sup>*,£</sup>                           |   | X |   |   |   |  |   |   |                  |   |   |   |
| Number of ventilator-free days                                            |   |   |   |   |   |  |   | X | X                | X |   |   |
| Disability (KATZ ADL)                                                     |   |   |   |   |   |  |   |   |                  |   | X | X |
| Health-Related Quality of Life (SF-36)                                    |   |   |   |   |   |  |   |   |                  |   | X | X |
| Self-rated health                                                         |   |   |   |   |   |  |   |   |                  |   | X | X |
| Pain-interference                                                         |   |   |   |   |   |  |   |   |                  |   | X | X |
| Post-Traumatic Stress-like Symptoms (PTSS-14, HADS)                       |   |   |   |   |   |  |   |   |                  |   | X | X |
| Cognitive Function (AD-8)                                                 |   |   |   |   |   |  |   |   |                  |   | X | X |
| Subsequent return to work, hospital and ED use, and location of residence |   |   |   |   |   |  |   |   |                  |   | X | X |
| Vital Status                                                              |   |   |   |   |   |  |   | X | X                | X | X | X |

X = Required

A = When available

\* = in patients enrolled in the intervention arm

\*\*\* = or at ICU discharge, whichever occurs first

<sup>B</sup> = Records clinically available creatinine, platelets, bilirubin, SBP and vasopressor use

<sup>#</sup> = Measure during reference period (06:00-10:00); other values may be obtained closest to 08:00 on the specified calendar date

<sup>£</sup> = in selected centers only, due to logistical considerations (n=30 patients from each group)

<sup>\$</sup> = in 5 selected centers only, due to logistical considerations (total n=25 patients)
