# Supplementary material for: Design and Rationale of the Sevoflurane for Sedation in Acute Respiratory Distress Syndrome (SESAR) Randomized Controlled Trial
Source: J Clin Med. 2022 May 16;11(10):2796. doi: 10.3390/jcm11102796 (PMC9147018; doi:10.3390/jcm11102796)
Supplement: Supplementary file 1 [file jcm-11-02796-s001.zip]

Archive with 7 entries (7 files):
- Supplementary Material File S1_Final__SESAR trial protocol & approval_v9_20211117.pdf
- Supplementary Material File S2_Final_SPIRIT Checklist.pdf
- Supplementary Material File S3_Final_Conservative fluid management approach.pdf
- Supplementary Material File S4_Final_Protocol for weaning from mechanical ventilation.pdf
- Supplementary Material File S5_Final_Time-Events Schedule.pdf
- Supplementary Material File S6_Final_Instruments and questionnaires.pdf
- Supplementary Material File S7_Final_Statistical Analysis Plan.pdf
